# Supplementary material for: Comparing the host behaviour ofN,N′-bis(9-phenyl-9-thioxanthenyl)ethylenediamine andN,N′-bis(9-phenyl-9-xanthenyl)ethylenediamine in the presence of various alkylated aromatic and aniline guests: crystal engineering considerations
Source: Royal Society of Chemistry journal article supplement (doi:10.1039/c9ce00823c), 2019-01-01
Supplement: c9ce00823c1.pdf [file c9ce00823c1.pdf]

### Supplementary Information

Comparing the host behaviour of *N,N'*-bis(9-phenyl-9-thioxanthenyl)ethylenediamine and *N,N'*-bis(9-phenyl-9-xanthenyl)ethylenediamine in the presence of various alkylated aromatic and aniline guests: crystal engineering considerations

Benita Barton,\*<sup>1</sup> Lize de Jager\*<sup>2</sup> and Eric C. Hosten

Department of Chemistry, PO Box 77000, Nelson Mandela University, Port Elizabeth, 6031, South Africa.

E-mail: [\\*1benita.barton@mandela.ac.za](mailto:*1benita.barton@mandela.ac.za); [\\*2s213337665@mandela.ac.za](mailto:*2s213337665@mandela.ac.za)

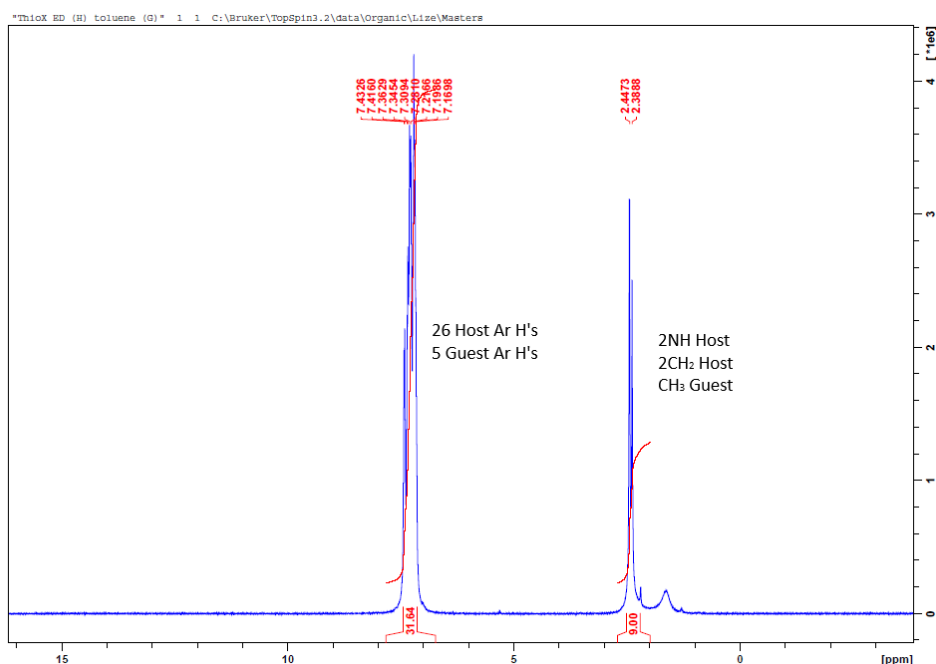

Figure S1a. <sup>1</sup>H-NMR spectrum for the complex between TOL and H<sub>1</sub>.

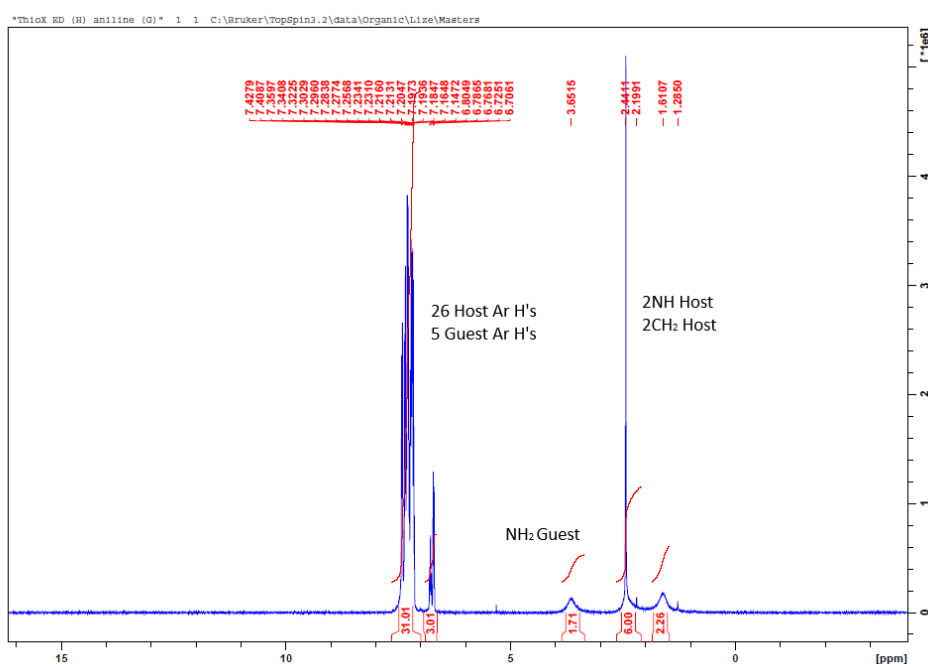

Figure S1b. <sup>1</sup>H-NMR spectrum for the complex between ANI and H<sub>1</sub>.

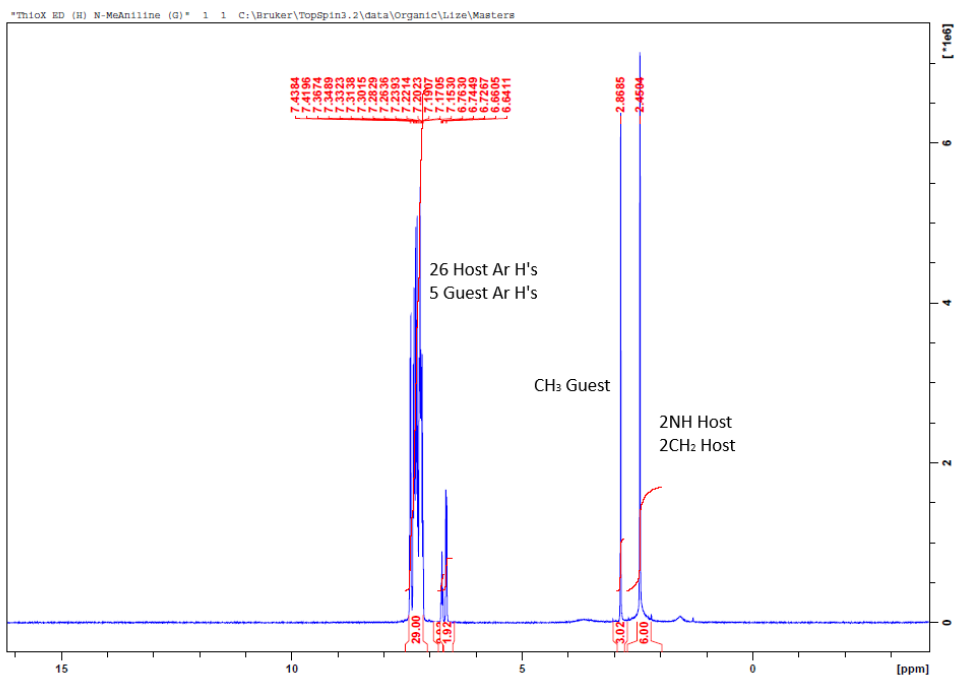

Figure S1c. <sup>1</sup>H-NMR spectrum for the complex between NMA and H<sub>1</sub>.

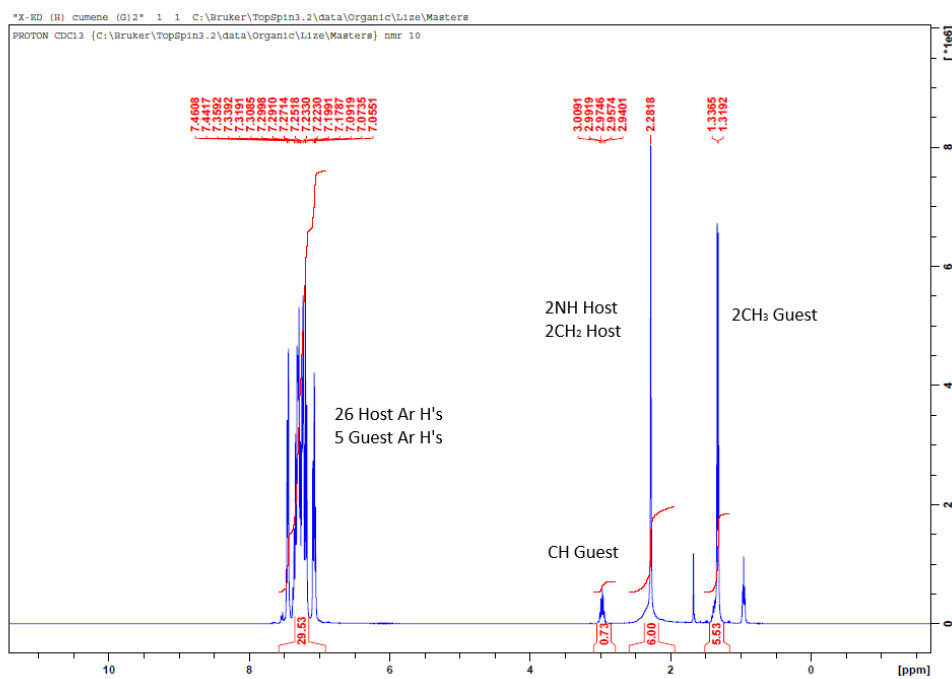

Figure S1d. <sup>1</sup>H-NMR spectrum for the complex between CU and H<sub>2</sub>.

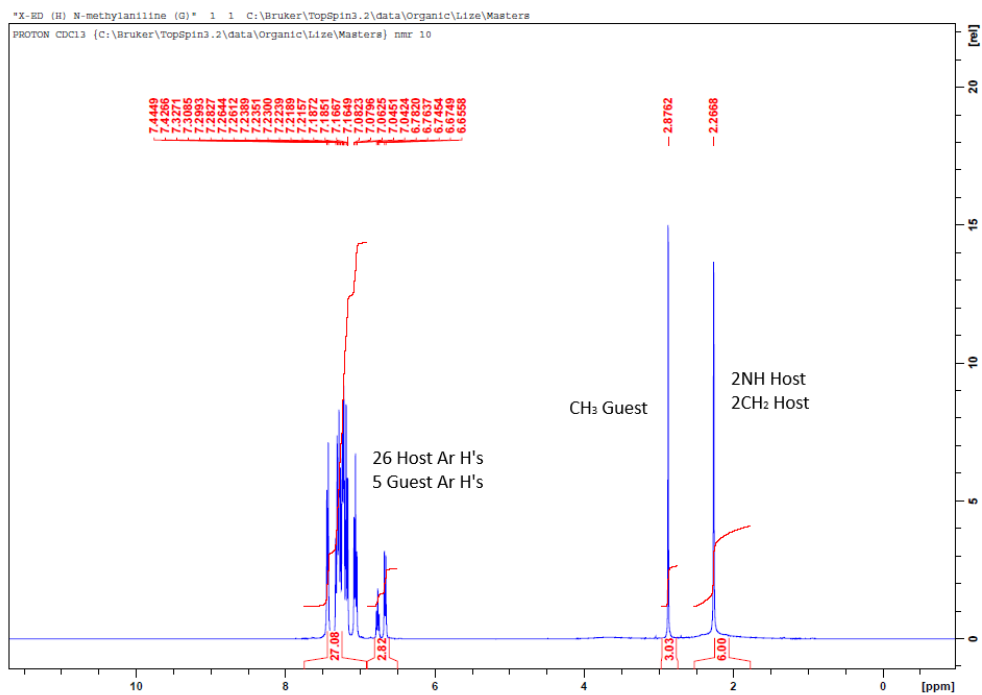

Figure S1e. <sup>1</sup>H-NMR spectrum for the complex between NMA and H<sub>2</sub>.

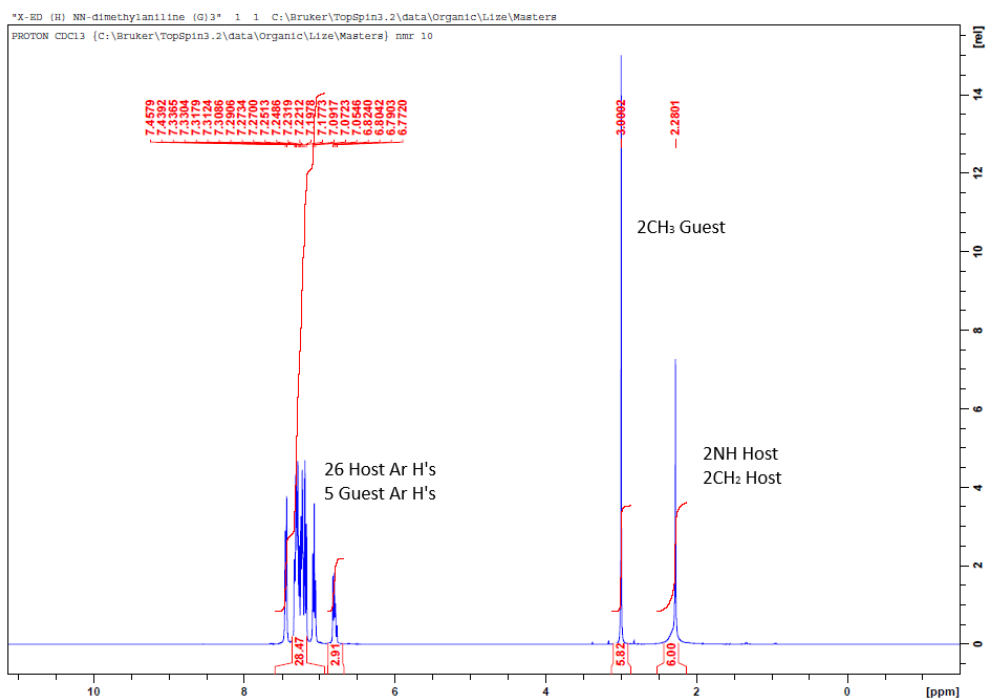

Figure S1f. <sup>1</sup>H-NMR spectrum for the complex between NNDMA and H<sub>2</sub>.

**Table S2.** Duplicate data for equimolar competition experiments of ANI, NMA and NNDMA with H<sub>1</sub>

| Comp:             | Batch 1         | Batch 2         | Average         | % e.s.d.s             |
|-------------------|-----------------|-----------------|-----------------|-----------------------|
| ANI + NMA         | 90.00:10.00     | 88.24:11.76     | 89.12:10.88     | (0.88): (0.88)        |
| ANI + NNDMA       | 93.77: 6.23     | 90.69:9.31      | 92.23:7.77      | (1.54): (1.54)        |
| NMA + NNDMA       | <sup>a</sup>    | <sup>a</sup>    | -               | -                     |
| ANI + NMA + NNDMA | 89.50:5.73:4.78 | 88.90:5.91:5.20 | 89.20:5.82:4.98 | (0.30): (0.09):(0.21) |

<sup>a</sup>No inclusion occurred.**Table S3.** Duplicate data for equimolar competition experiments of TOL, EB and CU with H<sub>1</sub>

| Comp:         | Batch 1         | Batch 2         | Average         | % e.s.d.s             |
|---------------|-----------------|-----------------|-----------------|-----------------------|
| TOL + EB      | 92.07:7.94      | 91.44:8.54      | 91.76:8.24      | (0.31): (0.31)        |
| TOL + CU      | 96.77:3.24      | 96.13:3.87      | 96.44:3.56      | (0.32): (0.32)        |
| EB + CU       | 62.09:37.91     | 63.70:36.30     | 62.90:37.10     | (0.81):(0.81)         |
| TOL + EB + CU | 89.08:8.74:2.18 | 90.50:7.70:1.80 | 89.90:8.22:1.88 | (0.71): (0.52):(0.19) |

**Table S4.** Duplicate data for equimolar competition experiments of ANI, NMA and NNDMA with H<sub>2</sub>

| Guests:           | Batch 1         | Batch 2         | Average         | % e.s.d.s             |
|-------------------|-----------------|-----------------|-----------------|-----------------------|
| ANI + NMA         | 24.03:75.97     | 21.74:78.26     | 22.89:77.12     | (1.15): (1.15)        |
| ANI + NNDMA       | 1.35:98.65      | 1.28:98.72      | 1.32:98.69      | (0.03): (0.03)        |
| NMA + NNDMA       | 7.57:92.43      | 5.77:94.23      | 6.67:93.33      | (0.90):(0.90)         |
| ANI + NMA + NNDMA | 1.99:5.99:92.01 | 5.38:6.17:88.46 | 3.69:6.08:90.24 | (1.70): (0.09):(1.78) |

**Table S5.** Duplicate data for equimolar competition experiments of TOL, EB and CU with H<sub>2</sub>

| Guests:       | Batch 1      | Batch 2      | Batch 3      | Average     | % e.s.d.s     |
|---------------|--------------|--------------|--------------|-------------|---------------|
| TOL + EB      | <sup>a</sup> | <sup>a</sup> | <sup>a</sup> | -           | -             |
| TOL + CU      | <sup>a</sup> | <sup>a</sup> | <sup>a</sup> | -           | -             |
| EB + CU       | 49.19:50.81  | 46.51:53.50  | 49.98:50.02  | 48.56:51.44 | (1.48):(1.48) |
| TOL + EB + CU | <sup>a</sup> | <sup>a</sup> | <sup>a</sup> | -           | -             |

<sup>a</sup>No inclusion occurred

**Table S6.** K values for competition experiment of ANI/NMA with H<sub>1</sub>.

| ANI ml  | ANI c   | NMA ml  | NMA c   | K values   |
|---------|---------|---------|---------|------------|
| 1       | 1       | 0       | 0       |            |
| 0,74531 | 0,92048 | 0,25469 | 0,07952 | 3,95560512 |
| 0,5402  | 0,94585 | 0,4598  | 0,05415 | 14,8675085 |
| 0,43038 | 0,91012 | 0,56962 | 0,08988 | 13,4019731 |
| 0,34044 | 0,90494 | 0,65956 | 0,09506 | 18,4431757 |
| 0,14723 | 0,02795 | 0,85277 | 0,97205 | 0,16654393 |
| 0       | 0       | 1       | 1       | 10,1669613 |

**Table S7.** K values for competition experiment of ANI/NNDMA with H<sub>1</sub>.

| ANI ml  | ANI c   | NNDMA ml | NNDMA c | K values   |
|---------|---------|----------|---------|------------|
| 1       | 1       | 0        | 0       |            |
| 0,7598  | 0,93357 | 0,2402   | 0,06643 | 4,44279576 |
| 0,57566 | 0,90274 | 0,42434  | 0,09726 | 6,84189397 |
| 0,47608 | 0,91477 | 0,52392  | 0,08523 | 11,811484  |
| 0,34071 | 0,86149 | 0,65929  | 0,13851 | 12,0354053 |
| 0,22098 | 0,70008 | 0,77902  | 0,29992 | 8,22882605 |
| 0       | 0       | 1        | 1       | 8,67208101 |

**Table S8.** K values for competition experiment of ANI/NNDMA with H<sub>2</sub>.

| NNDMA ml | NNDMA c | ANI ml  | ANI c   | K value    |
|----------|---------|---------|---------|------------|
| 1        | 1       | 0       | 0       |            |
| 0,84303  | 0,98557 | 0,15697 | 0,01443 | 12,7172958 |
| 0,63608  | 0,96269 | 0,36392 | 0,03731 | 14,7623465 |
| 0,56845  | 0,93178 | 0,43155 | 0,06822 | 10,369087  |
| 0,41709  | 0,94891 | 0,58291 | 0,05109 | 25,9573796 |
| 0,23338  | 0,60841 | 0,76662 | 0,39159 | 5,10365443 |
| 0        | 0       | 1       | 1       | 13,7819527 |

**Table S9.** K values for competition experiment of NMA/NNDMA with H<sub>2</sub>.

| NNDMA ml | NNDMA c | NMA ml  | NMA c   | K value    |
|----------|---------|---------|---------|------------|
| 1        | 1       | 0       | 0       |            |
| 0,81391  | 0,96842 | 0,18609 | 0,03158 | 7,01129557 |
| 0,61555  | 0,93217 | 0,38445 | 0,06783 | 8,5832119  |
| 0,5      | 0,93524 | 0,5     | 0,06476 | 14,4416306 |
| 0,43407  | 0,43577 | 0,56593 | 0,56423 | 1,00694117 |
| 0,20745  | 0,04099 | 0,79255 | 0,95901 | 0,16329317 |
| 0        | 0       | 1       | 1       | 6,24127449 |

**Table S10.** K values for competition experiment of ANI/NMA with H<sub>2</sub>.

| NMA ml  | NMA c   | ANI ml  | ANI c   | K value    |
|---------|---------|---------|---------|------------|
| 1       | 1       | 0       | 0       |            |
| 0,84382 | 0,94534 | 0,15618 | 0,05466 | 3,20106145 |
| 0,63729 | 0,80534 | 0,36271 | 0,19466 | 2,35464249 |
| 0,5147  | 0,79952 | 0,4853  | 0,20048 | 3,76022993 |
| 0,46543 | 0,75464 | 0,53457 | 0,24536 | 3,53253333 |
| 0,22835 | 0,18754 | 0,77165 | 0,81246 | 0,78002993 |
| 0       | 0       | 1       | 1       | 2,72569943 |

**Table 11.** K values for competition experiment of TOL/EB with H<sub>1</sub>.

| TOL ml  | TOL c   | EB ml   | EB c    | K value    |
|---------|---------|---------|---------|------------|
| 1       | 1       | 0       | 0       |            |
| 0,74434 | 0,96978 | 0,25566 | 0,03022 | 11,0222483 |
| 0,55354 | 0,92547 | 0,44646 | 0,07453 | 10,0153186 |
| 0,43868 | 0,91253 | 0,56132 | 0,08747 | 13,3490607 |
| 0,34253 | 0,87077 | 0,65747 | 0,12923 | 12,9335409 |
| 0,18537 | 0,21562 | 0,81463 | 0,78438 | 1,20804602 |
| 0       | 0       | 1       | 1       | 9,70564289 |

**Table 12.** K values for competition experiment of TOL/CU with H<sub>1</sub>.

| TOL ml  | TOL c   | CU ml   | CU c    | K value    |
|---------|---------|---------|---------|------------|
| 1       | 1       | 0       | 0       |            |
| 0,73171 | 0,98423 | 0,26829 | 0,01577 | 22,8839189 |
| 0,48083 | 0,9712  | 0,51917 | 0,0288  | 36,4111351 |
| 0,40474 | 0,96633 | 0,59526 | 0,03367 | 42,2097635 |
| 0,3137  | 0,94882 | 0,6863  | 0,05118 | 40,5586069 |
| 0,16365 | 0,51494 | 0,83635 | 0,48506 | 5,42541817 |
| 0       | 0       | 1       | 1       | 29,4977685 |

**Table 13.** K values for competition experiment of EB/CU with H<sub>1</sub>.

| EB ml   | EB c    | CU ml   | CU c    | K value    |
|---------|---------|---------|---------|------------|
| 1       | 1       | 0       | 0       |            |
| 0,77593 | 0,87745 | 0,22407 | 0,12255 | 2,06761766 |
| 0,54517 | 0,70261 | 0,45483 | 0,29739 | 1,97108394 |
| 0,4639  | 0,63175 | 0,5361  | 0,36825 | 1,982549   |
| 0,35935 | 0,5158  | 0,64065 | 0,4842  | 1,89915204 |
| 0,18003 | 0,2538  | 0,81997 | 0,7462  | 1,54913567 |
| 0       | 0       | 1       | 1       | 1,89390766 |

**Table S14.** K values for competition experiment of CU/EB with H<sub>2</sub>.

| CU ml   | CU c    | EB ml   | EB c    | K value    |
|---------|---------|---------|---------|------------|
| 1       | 1       | 0       | 0       |            |
| 0,78946 | 0,8187  | 0,21054 | 0,1813  | 1,20429109 |
| 0,55886 | 0,62882 | 0,44114 | 0,37118 | 1,33725796 |
| 0,47916 | 0,50022 | 0,52084 | 0,49978 | 1,08794253 |
| 0,36782 | 0,35244 | 0,63218 | 0,64756 | 0,93542848 |
| 0,19814 | 0,15228 | 0,80186 | 0,84772 | 0,72697057 |
| 0       | 0       | 1       | 1       | 1,05837813 |

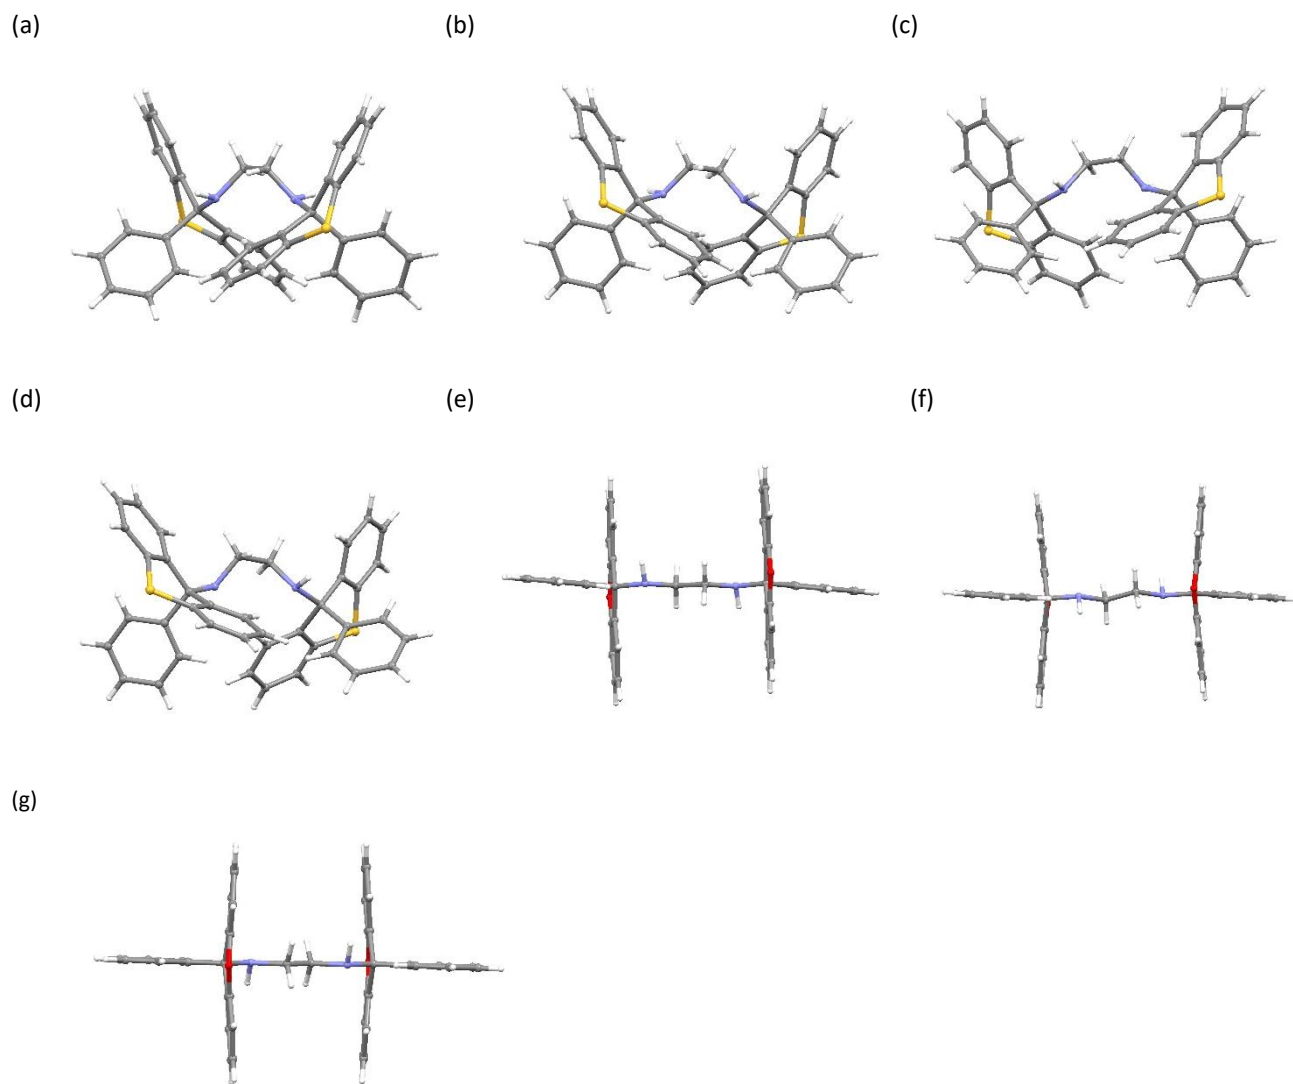

**Figure S15.** Host geometry in complexes (a) H<sub>1</sub>·TOL, (b) H<sub>1</sub>·EB, (c) H<sub>1</sub>·ANI, (d) H<sub>1</sub>·NMA, (e) H<sub>2</sub>·CU, (f) H<sub>2</sub>·NMA and (g) H<sub>2</sub>·NNDMA; guests were removed for ease of examination.

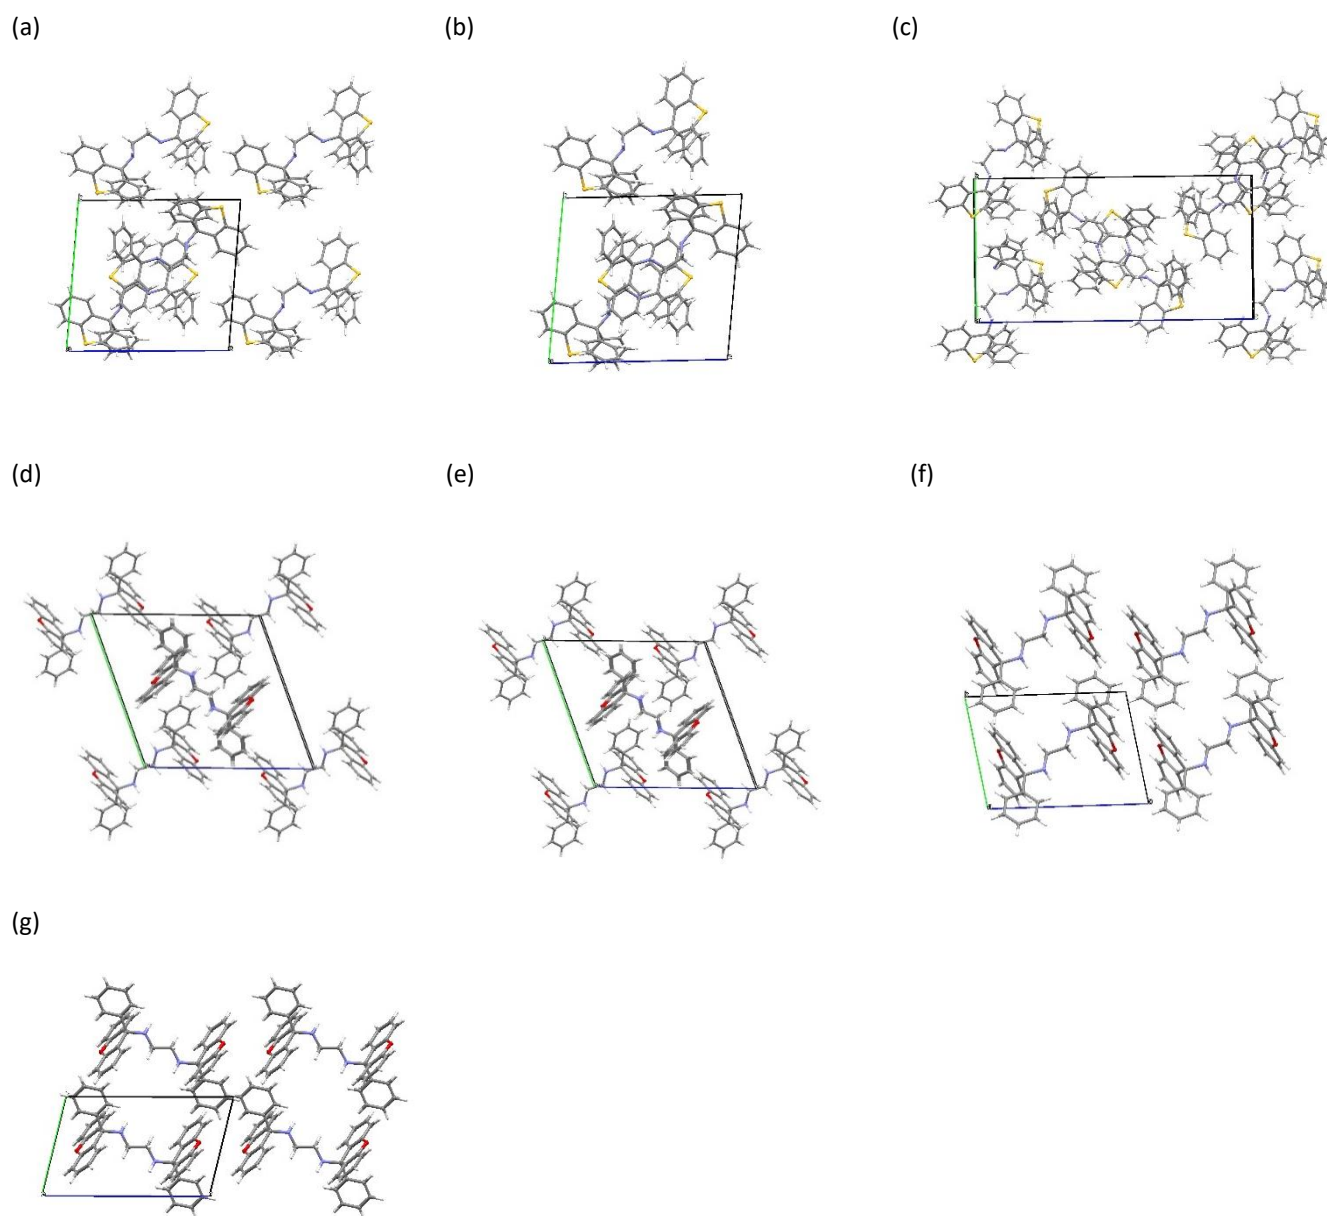

**Figure S16.** Host packing in complexes (a) H<sub>1</sub>-TOL, (b) H<sub>1</sub>-EB, (c) H<sub>1</sub>-ANI, (d) H<sub>1</sub>-NMA, (e) H<sub>2</sub>-CU, (f) H<sub>2</sub>-NMA and (g) H<sub>2</sub>-NNDMA; guests were removed for ease of examination.



**Table S17.** Crystallographic data for H<sub>1</sub>·TOL and H<sub>1</sub>·EB.<sup>a</sup>

| Non-covalent interaction                                                                               | H <sub>1</sub> ·TOL                                | H <sub>1</sub> ·EB                                 | Symmetry             |
|--------------------------------------------------------------------------------------------------------|----------------------------------------------------|----------------------------------------------------|----------------------|
| $\pi \cdots \pi$ (H $\cdots$ H and H $\cdots$ G)                                                       | 4.361(1) – 5.919(1) Å<br>5.045(1) – 5.919(1) Å [8] | 4.521(1) – 5.997(1) Å<br>4.999(1) – 5.997(1) Å [7] |                      |
| CH $\cdots$ $\pi$ (host-host)                                                                          |                                                    |                                                    |                      |
| C <sub>(host)</sub> –H <sub>32</sub> $\cdots$ C <sub>(host)</sub>                                      | 2.80 Å, 134°                                       |                                                    | x, y, z              |
| C <sub>(host)</sub> –H <sub>(host)</sub> $\cdots$ C <sub>(host)</sub>                                  | 2.71 Å, 147°                                       |                                                    | 3/2–x, –1/2+y, 1/2–z |
| C <sub>(host)</sub> –H <sub>(host)</sub> $\cdots$ C <sub>(host)</sub>                                  | 2.84 Å, 138°                                       |                                                    | x, 1+y, z            |
| C <sub>(guest)</sub> –H <sub>(guest)</sub> $\cdots$ C <sub>(host)</sub>                                | 2.66 Å, 162°                                       |                                                    | 3/2–x, –1/2+y, 1/2–z |
| C <sub>(host)</sub> –H <sub>(host)</sub> $\cdots$ C <sub>(host)</sub>                                  |                                                    | 2.96 Å, 139°                                       | x, y, 1+z            |
| C <sub>(guest)</sub> –H <sub>(guest 1)</sub> $\cdots$ C <sub>(host)</sub>                              |                                                    | 2.99 Å, 155°                                       | 1+x, y, –1+z         |
| C <sub>(guest)</sub> –H <sub>(guest 2)</sub> $\cdots$ C <sub>(host)</sub>                              |                                                    | 2.88 Å, 163°                                       | 1+x, y, –1+z         |
| H-bonding (intramolecular)                                                                             | Non-classical                                      | Non-classical                                      |                      |
| C <sub>(host)</sub> –H <sub>(host)</sub> $\cdots$ N <sub>(host)</sub>                                  | 2.64(2) Å, 103°                                    | 2.761(2) Å, 103°                                   | x, y, z              |
| C <sub>(host)</sub> –H <sub>(host)</sub> $\cdots$ N <sub>(host)</sub>                                  | 3.443(2) Å, 152°                                   | 3.432(2) Å, 154°                                   | x, y, z              |
| C <sub>(host)</sub> –H <sub>(host)</sub> $\cdots$ N <sub>(host)</sub>                                  | 2.906(2) Å, 102°                                   | 2.904(2) Å, 102°                                   | x, y, z              |
| C <sub>(host)</sub> –H <sub>(host)</sub> $\cdots$ N <sub>(host)</sub>                                  |                                                    | 3.456(2) Å, 151°                                   | x, y, z              |
| C <sub>(host)</sub> –H <sub>(host)</sub> $\cdots$ N <sub>(host)</sub>                                  | 2.766(2) Å, 103°                                   | 2.764(2) Å, 103°                                   | x, y, z              |
| C <sub>(host)</sub> –H <sub>(host)</sub> $\cdots$ N <sub>(host)</sub>                                  | 2.897(2) Å, 102°                                   | 2.899(2) Å, 102°                                   | x, y, z              |
| Other short contacts (host/<br>guest and guest/guest)                                                  |                                                    |                                                    |                      |
| C <sub>(host)</sub> –H <sub>(host)</sub> $\cdots$ H <sub>(guest)</sub> –C <sub>(guest)</sub>           | 2.35 Å, 138°(<)                                    |                                                    | 3/2–x, 1/2+y, 1/2–z  |
| C <sub>(host)</sub> –H <sub>(host)</sub> $\cdots$ H <sub>(guest)</sub> –C <sub>(guest)</sub>           | 2.37 Å, 129°(<)                                    |                                                    | x, y, z              |
| C <sub>(host)</sub> –H <sub>(host)</sub> $\cdots$ C <sub>(host)</sub> –C <sub>(host)</sub>             |                                                    | 2.86 Å, 145° (<)                                   | –x, 1–y, 1–z         |
| C <sub>(guest 2)</sub> –C <sub>(guest 2)</sub> $\cdots$ H <sub>(guest 2)</sub> –C <sub>(guest 2)</sub> |                                                    | 1.89 Å, 131° (<<)                                  | 2–x, 1–y, –z         |

<sup>a</sup>Distances denoted by < are contacts that measure less than the sum of the van der Waals radii of the atoms involved while those denoted by << is this sum minus 0.2 Å.

**Table S18.** Crystallographic data for  $H_1 \cdot ANI$  and  $H_1 \cdot NMA$ .<sup>a,b</sup>

| Non-covalent interaction                                                                                                                                                                                                                                                                                                                                                                                                                                                                                                                                                                                                                                                                                                                                                                  | $H_1 \cdot ANI$                                                                                                                                | $H_1 \cdot NMA$                                                                                                                           | Symmetry                                                                                                                     |
|-------------------------------------------------------------------------------------------------------------------------------------------------------------------------------------------------------------------------------------------------------------------------------------------------------------------------------------------------------------------------------------------------------------------------------------------------------------------------------------------------------------------------------------------------------------------------------------------------------------------------------------------------------------------------------------------------------------------------------------------------------------------------------------------|------------------------------------------------------------------------------------------------------------------------------------------------|-------------------------------------------------------------------------------------------------------------------------------------------|------------------------------------------------------------------------------------------------------------------------------|
| $\pi \cdots \pi$ (H $\cdots$ H and H $\cdots$ G)<br>H $\cdots$ G major<br>H $\cdots$ G minor                                                                                                                                                                                                                                                                                                                                                                                                                                                                                                                                                                                                                                                                                              | 4.379(1) – 5.935(3) Å<br>4.885(1) – 5.927(1) Å [7]<br>4.714(5) – 5.935(3) Å [8]                                                                | 4.658(1) – 5.932(1) Å<br>4.935(1) – 5.893 (1) Å [7]                                                                                       |                                                                                                                              |
| CH $\cdots$ $\pi$ (host-host)<br><br>C <sub>(host)</sub> –H <sub>(host)</sub> $\cdots$ C <sub>G(host)</sub><br>C <sub>(host)</sub> –H <sub>(host)</sub> $\cdots$ C <sub>G(host)</sub><br>C <sub>(host)</sub> –H <sub>(host)</sub> $\cdots$ C <sub>G(host)</sub><br>C <sub>(host)</sub> –H <sub>(host)</sub> $\cdots$ C <sub>G(host)</sub><br><br>C <sub>(host)</sub> –H <sub>(host)</sub> $\cdots$ C <sub>G(host)</sub><br>C <sub>(guest)</sub> –H <sub>(guest)</sub> $\cdots$ C <sub>G(host)</sub>                                                                                                                                                                                                                                                                                       | 2.78 Å, 134°<br>2.71 Å, 149°<br>2.84 Å, 137°<br>2.93 Å, 133°<br><br>2.94 Å, 139°<br>2.93 Å, 140°                                               |                                                                                                                                           | x, y, z<br>3/2–x, –1/2+y, 1/2–z<br>x, 1+y, z<br>x, y, z<br><br>x, y, 1+z<br>–x, 1–y, 1–z                                     |
| X–Y $\cdots$ $\pi$ (guest-host)<br><br>C <sub>(guest)</sub> –N <sub>(guest)</sub> $\cdots$ C <sub>G(host)</sub>                                                                                                                                                                                                                                                                                                                                                                                                                                                                                                                                                                                                                                                                           | 3.518 (4) Å, 109°                                                                                                                              |                                                                                                                                           | 2–x, 1–y, 1–z                                                                                                                |
| H-bonding (Intramolecular)<br><br>C <sub>(host)</sub> –H <sub>(host)</sub> $\cdots$ N <sub>(host)</sub><br>C <sub>(host)</sub> –H <sub>(host)</sub> $\cdots$ N <sub>(host)</sub>                                                                                                                                                                                                                                                                                                      | Non-classical<br><br>2.766(2) Å, 103°<br>3.436(2) Å, 152°<br>2.913(2) Å, 102°<br><br>2.775(2) Å, 103°<br>2.896(2) Å, 102°                      | Non-classical<br><br>2.767(2) Å, 103°<br>3.466(2) Å, 158°<br>2.910(2) Å, 102°<br>3.454(2) Å, 148°<br>2.768(2) Å, 103°<br>2.900(2) Å, 102° | x, y, z<br>x, y, z<br>x, y, z<br>x, y, z<br>x, y, z<br>x, y, z                                                               |
| Other short contacts (host/<br>guest and guest/guest)<br><br>C <sub>(host)</sub> –H <sub>(host)</sub> $\cdots$ C <sub>(host)</sub> –C <sub>(host)</sub><br>C <sub>(host)</sub> –H <sub>(host)</sub> $\cdots$ H <sub>(guest 1)</sub> –C <sub>(guest 1)</sub><br>C <sub>(host)</sub> –H <sub>(host)</sub> $\cdots$ H <sub>(guest 2)</sub> –C <sub>(guest 2)</sub><br>C <sub>(guest 2)</sub> –N <sub>(guest 2)</sub> $\cdots$ N <sub>(guest 2)</sub> –C <sub>(Guest 2)</sub><br>C <sub>(guest 2)</sub> –H <sub>(guest 2)</sub> $\cdots$ H <sub>(host)</sub> –C <sub>(host)</sub><br>C <sub>(guest 2)</sub> –N <sub>(guest 2)</sub> $\cdots$ C <sub>(host)</sub> –C <sub>(host)</sub><br><br>C <sub>(host)</sub> –H <sub>(host)</sub> $\cdots$ H <sub>(guest 1)</sub> –C <sub>(guest 1)</sub> | 2.89Å, 153°(<)<br>2.34Å, 134°(<)<br>2.30Å, 149°(<)<br>2.3890Å, 125.1(6)°(<<)<br>2.35Å, 138°(<)<br>3.244Å, 105.5(2)°(<)<br><br>2.37 Å, 143° (<) |                                                                                                                                           | x, 1+y, z<br>–1/2+x, 1/2–y, –1/2+z<br>–1/2+x, 1/2–y, –1/2+z<br>2–x, –y, 1–z<br>1–x, 1–y, 1–z<br>x, 1+y, z<br><br>x, 1+y, 1+z |

<sup>a</sup>Number of H-G interactions indicated in parentheses.

<sup>b</sup>Distances denoted by < are contacts that measure less than the sum of the van der Waals radii of the atoms involved while those denoted by << is this sum minus 0.2 Å.

**Table S19.** Crystallographic data for H<sub>2</sub>·CU.<sup>a</sup>

| Non-covalent interaction                                                                         | H <sub>2</sub> ·CU  | Symmetry      |
|--------------------------------------------------------------------------------------------------|---------------------|---------------|
| $\pi \cdots \pi$ (H $\cdots$ H and H $\cdots$ G)                                                 | 3.981(1)–5.977(1) Å |               |
| CH $\cdots$ $\pi$                                                                                |                     |               |
| C <sub>(host)</sub> –H <sub>(host)</sub> $\cdots$ C <sub>(host)</sub> G <sub>(host)</sub>        | 2.85 Å, 90°         | x, y, z       |
| C <sub>(host)</sub> –H <sub>(host)</sub> $\cdots$ C <sub>(host)</sub> G <sub>(host)</sub>        | 2.96 Å, 84°         | x, y, z       |
| C <sub>(host)</sub> –H <sub>(host)</sub> $\cdots$ C <sub>(host)</sub> G <sub>(host)</sub>        | 2.99 Å, 80°         | x, y, z       |
| C <sub>(host)</sub> –H <sub>(host)</sub> $\cdots$ C <sub>(host)</sub> G <sub>(host)</sub>        | 2.74 Å, 94°         | x, y, z       |
| C <sub>(host)</sub> –H <sub>(host)</sub> $\cdots$ C <sub>(host)</sub> G <sub>(host)</sub>        | 2.94 Å, 143°        | x, –1+y, z    |
| C <sub>(host)</sub> –H <sub>(host)</sub> $\cdots$ C <sub>(guest)</sub> G <sub>(guest)</sub>      | 3.00 Å, 117°        | –1+x, –1+y, z |
| C <sub>(host)</sub> –H <sub>(host)</sub> $\cdots$ C <sub>(host)</sub> G <sub>(host)</sub>        | 2.68 Å, 105°        | x, y, z       |
| C <sub>(host)</sub> –H <sub>(host)</sub> $\cdots$ C <sub>(host)</sub> G <sub>(host)</sub>        | 2.97 Å, 151°        | 1+x, y, z     |
| C <sub>(host)</sub> –H <sub>(host)</sub> $\cdots$ C <sub>(host)</sub> G <sub>(host)</sub>        | 2.77 Å, 104°        | x, y, z       |
| C <sub>(host)</sub> –H <sub>(host)</sub> $\cdots$ C <sub>(host)</sub> G <sub>(host)</sub>        | 2.69 Å, 156°        | 1–x, 1–y, 1–z |
| H-bonding (intramolecular)                                                                       | Non-classical       |               |
| C <sub>(host)</sub> –H <sub>(host)</sub> $\cdots$ N <sub>(host)</sub>                            | 2.790(3) Å, 102°    | x, y, z       |
| C <sub>(host)</sub> –H <sub>(host)</sub> $\cdots$ N <sub>(host)</sub>                            | 2.758 (3) Å, 102°   | x, y, z       |
| Other short contacts (host/guest and guest/guest)                                                |                     |               |
| C <sub>(host)</sub> –C <sub>(host)</sub> $\cdots$ H <sub>(host)</sub> –C <sub>(host)</sub>       | 2.87 Å, 112° (<)    | –x, 1–y, 1–z  |
| C <sub>(host)</sub> –C <sub>(host)</sub> $\cdots$ C <sub>(guest 1)</sub> –C <sub>(guest 1)</sub> | 3.33 Å, 112° (<)    | –1+x, –1+y, z |
| C <sub>(host)</sub> –H <sub>(host)</sub> $\cdots$ H <sub>(host)</sub> –C <sub>(host)</sub>       | 2.35 Å, 131° (<)    | x, y, z       |
| C <sub>(host)</sub> –H <sub>(host)</sub> $\cdots$ C <sub>(guest 1)</sub> –C <sub>(guest 1)</sub> | 2.88 Å, 131° (<)    | 1–x, 1–y, –z  |
| C <sub>(host)</sub> –H <sub>(host)</sub> $\cdots$ H <sub>(host)</sub> –C <sub>(host)</sub>       | 2.78 Å, 101° (<)    | –1+x, y, z    |
| C <sub>(guest 1)</sub> –H <sub>(guest 1)</sub> $\cdots$ C <sub>(host)</sub> –O <sub>(host)</sub> | 2.83 Å, 169° (<)    | 1+x, y, z     |
| C <sub>(guest 2)</sub> –H <sub>(guest 2)</sub> $\cdots$ C <sub>(host)</sub> –O <sub>(host)</sub> | 2.72 Å, 150° (<)    | 1–x, 1–y, 1–z |

<sup>a</sup>Distances denoted by < are contacts that measure less than the sum of the van der Waals radii of the atoms involved.

**Table S20.** Crystallographic data for H<sub>2</sub>·NMA and H<sub>2</sub>·NNDMA.<sup>a</sup>

| Non-covalent interaction                                                               | H <sub>2</sub> ·NMA                            | H <sub>2</sub> ·NNDMA                          | Symmetry      |
|----------------------------------------------------------------------------------------|------------------------------------------------|------------------------------------------------|---------------|
| π···π (H···H and H···G)<br>H···G interactions                                          | 4.090(1)–5.930(1) Å<br>4.735(1)–5.930(1) Å [6] | 3.919(2)–5.839(3) Å<br>4.977(3)–5.839(3) Å [8] |               |
| CH···π (host-host)                                                                     |                                                |                                                |               |
| C <sub>(host)</sub> –H <sub>(host)</sub> ···C <sub>(host)</sub> G <sub>(host)</sub>    | 2.91 Å, 77°                                    |                                                | x, y, z       |
| C <sub>(host)</sub> –H <sub>(host)</sub> ···C <sub>(host)</sub> G <sub>(host)</sub>    | 2.57 Å, 97°                                    |                                                | x, y, z       |
| C <sub>(host)</sub> –H <sub>(host)</sub> ···C <sub>(guest)</sub> G <sub>(guest)</sub>  | 2.95 Å, 127°                                   |                                                | x, 1+y, z     |
| C <sub>(host)</sub> –H <sub>(host)</sub> ···C <sub>(host)</sub> G <sub>(host)</sub>    | 2.61 Å, 163°                                   |                                                | 2–x, 2–y, 2–z |
| C <sub>(host)</sub> –H <sub>(host)</sub> ···C <sub>(host)</sub> G <sub>(host)</sub>    | 2.83 Å, 104°                                   |                                                | x, y, z       |
| C <sub>(guest)</sub> –H <sub>(guest)</sub> ···C <sub>(host)</sub> G <sub>(host)</sub>  | 2.89 Å, 139°                                   |                                                | x, y, z       |
| C <sub>(host)</sub> –H <sub>(host)</sub> ···C <sub>(host)</sub> G <sub>(host)</sub>    |                                                | 3.00 Å, 142°                                   | x, –1+y, z    |
| C <sub>(host)</sub> –H <sub>(host)</sub> ···C <sub>(host)</sub> G <sub>(host)</sub>    |                                                | 2.93 Å, 142°                                   | 1+x, y, z     |
| C <sub>(host)</sub> –H <sub>(host)</sub> ···C <sub>(guest)</sub> G <sub>(guest)</sub>  |                                                | 2.95 Å, 141°                                   | 1–x, 1–y, 1–z |
| C <sub>(host)</sub> –H <sub>(host)</sub> ···C <sub>(host)</sub> G <sub>(host)</sub>    |                                                | 2.90 Å, 141°                                   | 1–x, 2–y, –z  |
| C <sub>(host)</sub> –H <sub>(host)</sub> ···C <sub>(host)</sub> G <sub>(host)</sub>    |                                                | 2.57 Å, 106°                                   | x, y, z       |
| H-bonding (intramolecular)                                                             | Non-classical                                  | Non-classical                                  |               |
| C <sub>(host)</sub> –H <sub>(host)</sub> ···N <sub>(host)</sub>                        | 2.804(1) Å, 102°                               | 2.770(2) Å, 103°                               | x, y, z       |
| Other short contacts (host/<br>guest and guest/guest)                                  |                                                |                                                |               |
| C <sub>(host)</sub> –H <sub>(host)</sub> ···H <sub>(guest)</sub> –C <sub>(guest)</sub> | 2.32 Å, 144° (<)                               |                                                | 2–x, 1–y, 1–z |
| C <sub>(host)</sub> –H <sub>(host)</sub> ···O <sub>(host)</sub> –C <sub>(host)</sub>   | 2.64 Å, 165° (<)                               |                                                | 1+x, 1+y, z   |
| C <sub>(host)</sub> –H <sub>(host)</sub> ···C <sub>(host)</sub> –C <sub>(host)</sub>   |                                                | 2.81 Å, 136° (<)                               | 1–x, 2–y, –z  |
| N <sub>(host)</sub> –H <sub>(host)</sub> ···H <sub>(guest)</sub> –C <sub>(guest)</sub> |                                                | 2.26 Å, 168° (<)                               | –1+x, 1+y, z  |
| C <sub>(host)</sub> –H <sub>(host)</sub> ···C <sub>(guest)</sub> –N <sub>(guest)</sub> |                                                | 2.75 Å, 146° (<)                               | 1–x, 1–y, 1–z |

<sup>a</sup>Distances denoted by < are contacts that measure less than the sum of the van der Waals radii of the atoms involved.

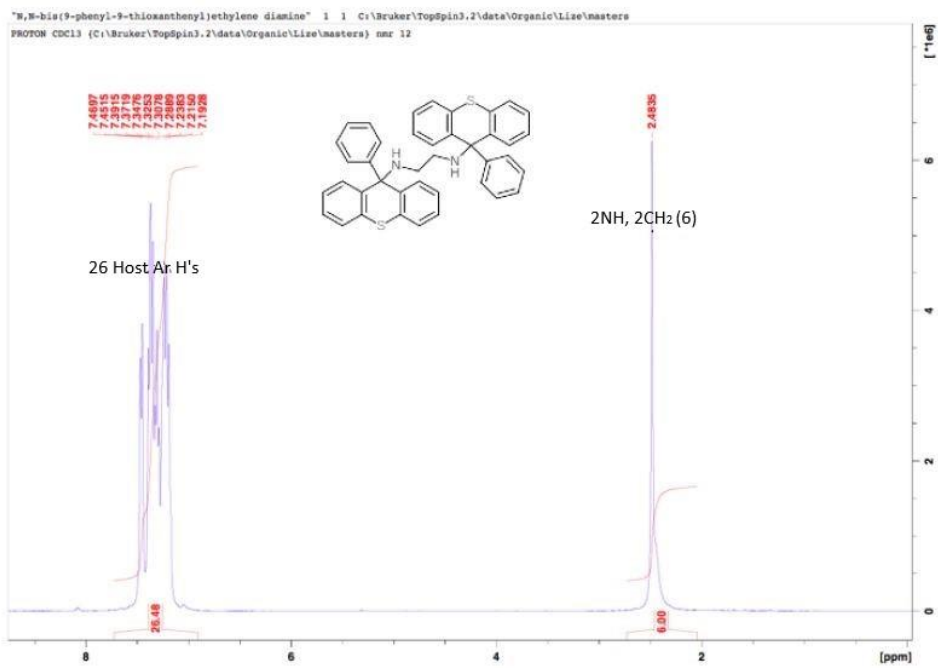

Figure S21a. <sup>1</sup>H-NMR spectrum for H<sub>1</sub>.

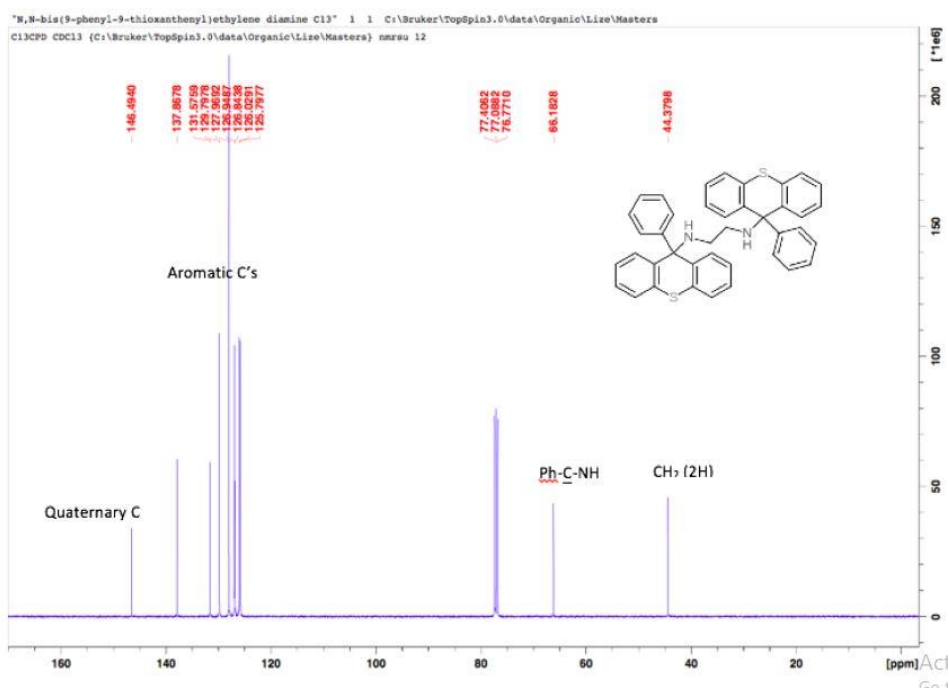

Figure S21b. <sup>13</sup>C-NMR spectrum for H<sub>1</sub>.

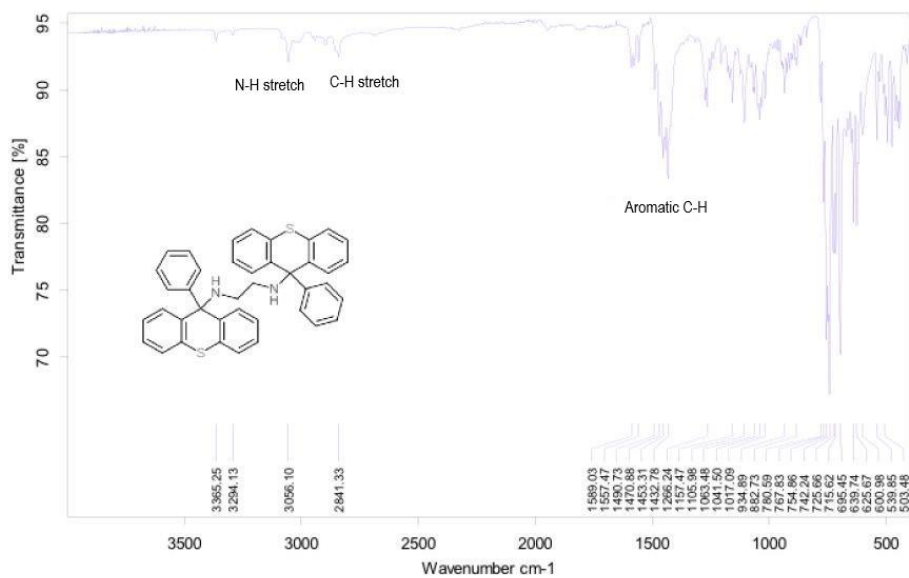

Figure S21c. IR spectrum for H<sub>1</sub>.

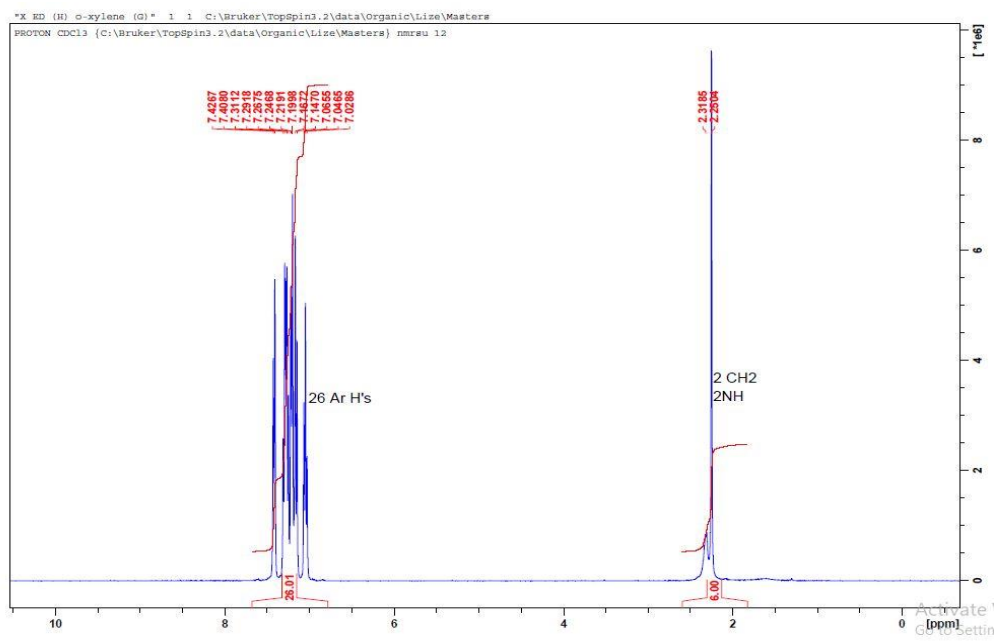

Figure S21d. <sup>1</sup>H-NMR spectrum for H<sub>2</sub>.

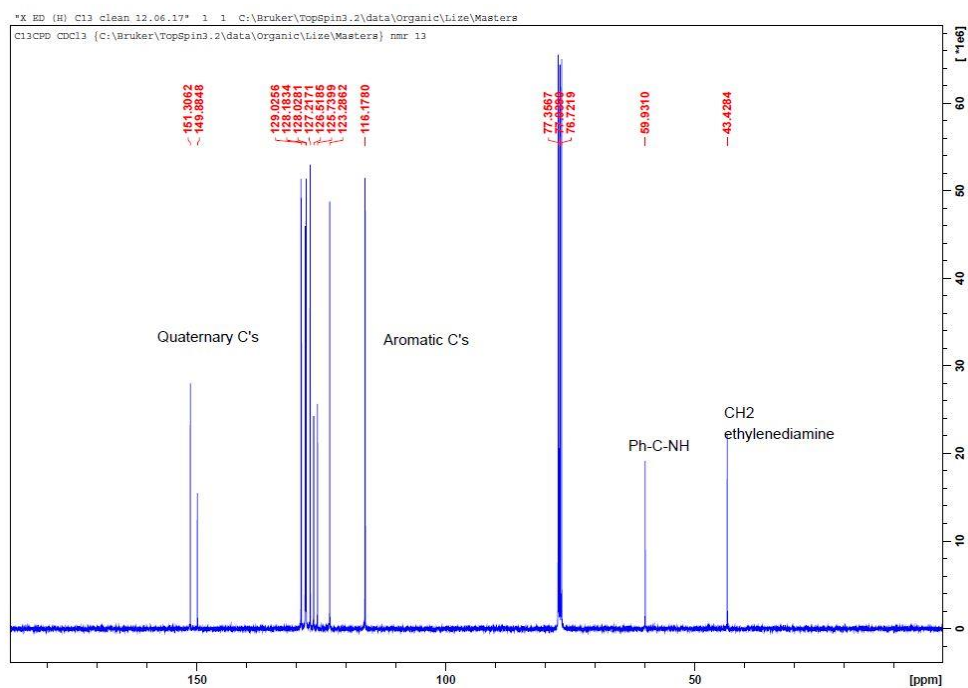

Figure S21e.  $^{13}\text{C}$ -NMR spectrum for  $\text{H}_2$ .

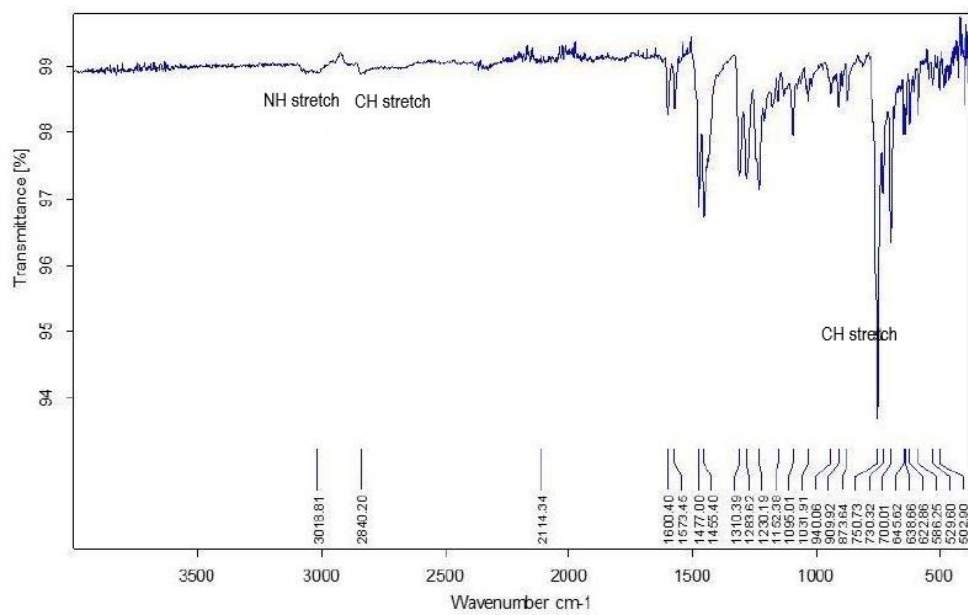

Figure S21f. IR spectrum for  $\text{H}_2$ .

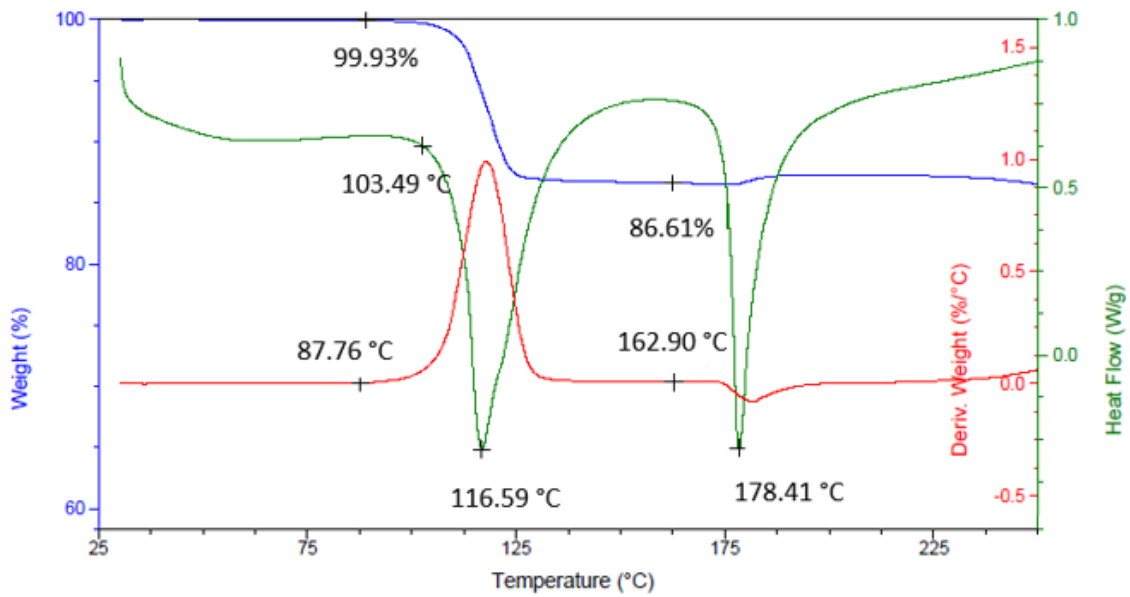

Figure S22a. Overlaid thermal traces (DSC, TG and DTG) for the  $H_1$ -ANI complex

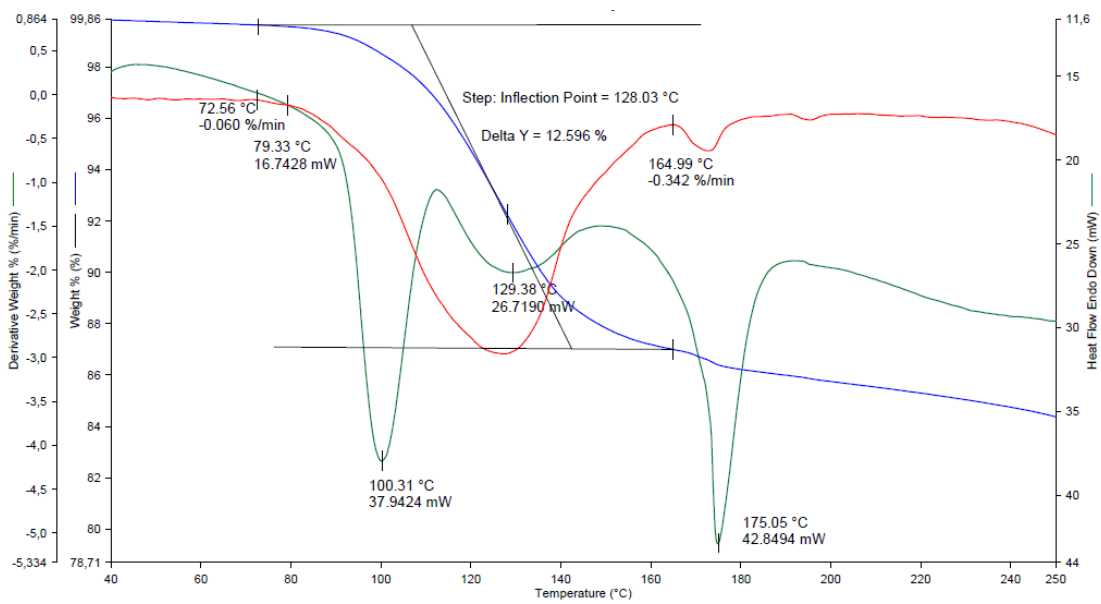

Figure S22b. Overlaid thermal traces (DSC, TG and DTG) for the  $H_1$ -NMA complex



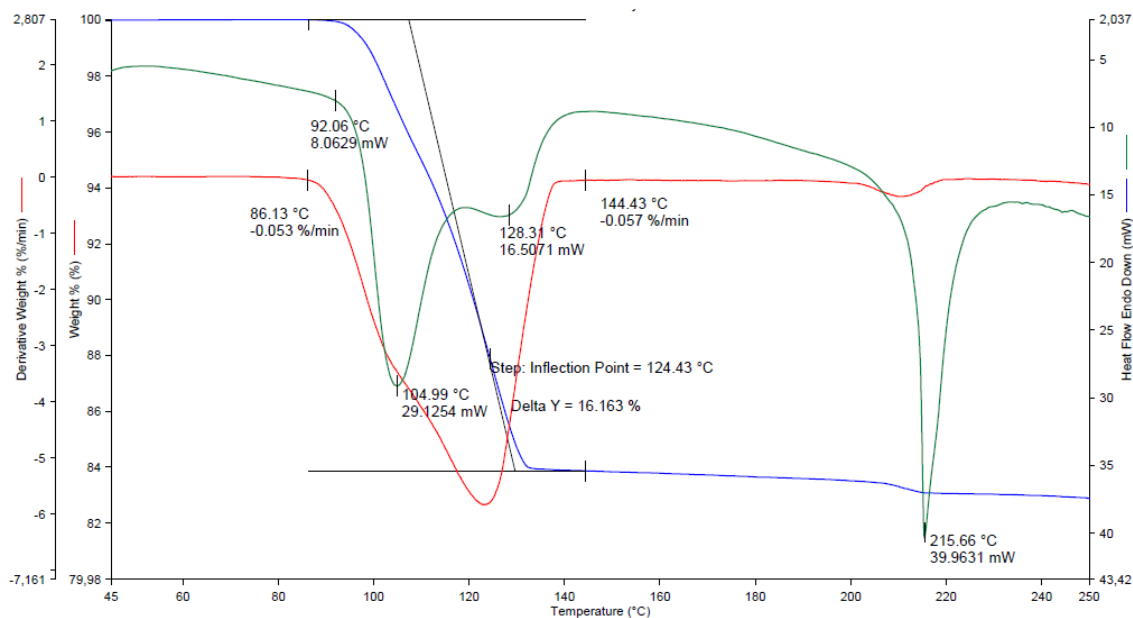

Figure S22c. Overlaid thermal traces (DSC, TG and DTG) for the  $H_2 \cdot NMA \cdot 0.406(H_2O)$  complex

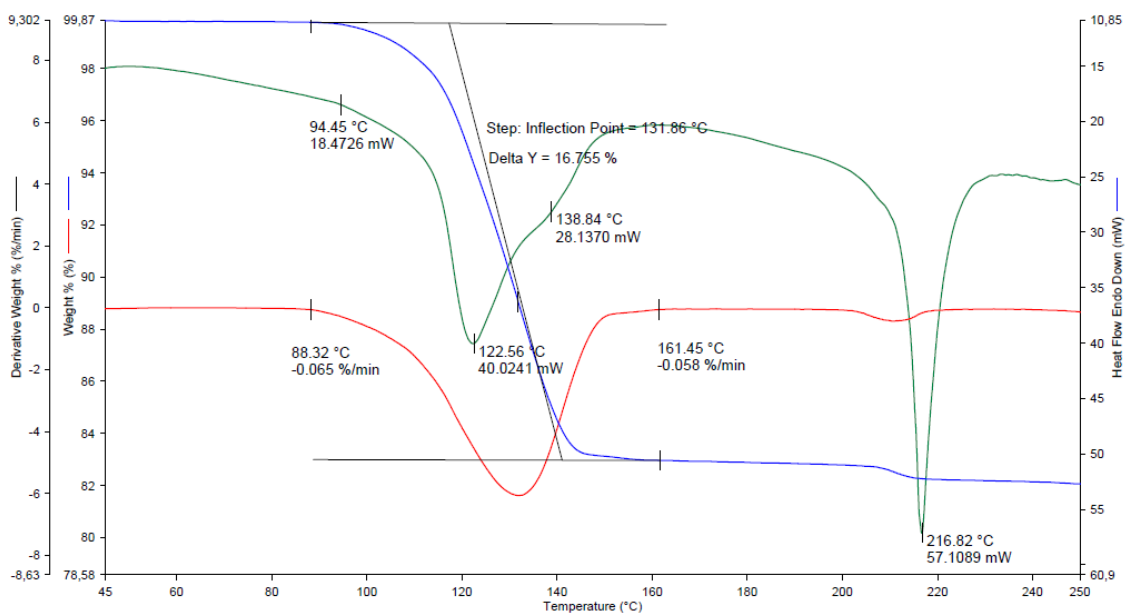

Figure S22d. Overlaid thermal traces (DSC, TG and DTG) for the  $H_2 \cdot NNDMA$  complex
